# Supplementary material for: Effect of Liquefaction of Honey on the Content of Phenolic Compounds
Source: MDPI journal article supplement (doi:10.3390/molecules28020714), 2023-01-11
Supplement: s1 [file s1]

# **Effect of liquefaction of honey on the content of phenolic compounds**

Tomáš Hájek\*

Department of Analytical Chemistry, Faculty of Chemical Technology, University of Pardubice,  
Studentská 95, 532 10 Pardubice, Czech Republic

\*Corresponding author, e-mail: [tomas.hajek@upce.cz](mailto:tomas.hajek@upce.cz), tel.: +420 466 037 038

**Supplementary materials**

**Figure S1.** Effect of temperature on treatment time of honey in a microwave oven at a rated power of 90 W.

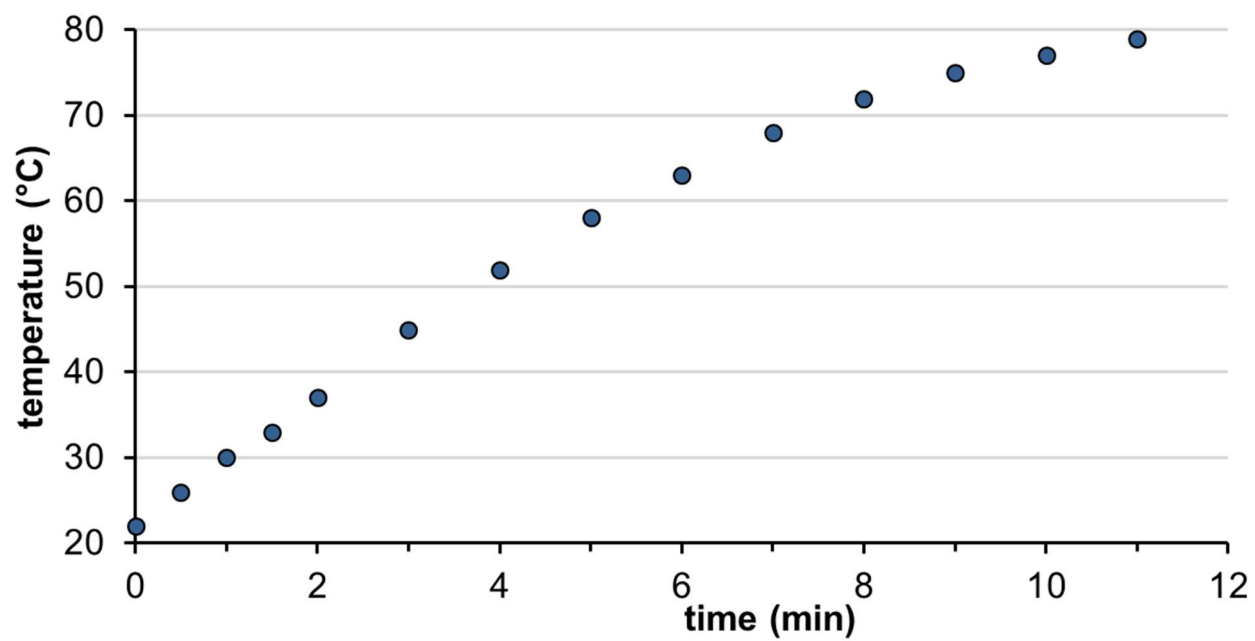

**Table S1.** Average concentration of tested compound in untreated honey and liquefied honey and standard deviation (SD, n=4). WB – water bath, USB – ultrasonic bath, MW – microwave.

|                          | untreated honey |       | WB 60 °C      |      | WB 80 °C      |      | USB 60 W      |      | MW 90 W       |      | MW 270 W      |      | MW 450 W      |      | MW 900 W      |      |
|--------------------------|-----------------|-------|---------------|------|---------------|------|---------------|------|---------------|------|---------------|------|---------------|------|---------------|------|
| Compound                 | conc. (µg/kg)   | SD    | conc. (µg/kg) | SD   | conc. (µg/kg) | SD   | conc. (µg/kg) | SD   | conc. (µg/kg) | SD   | conc. (µg/kg) | SD   | conc. (µg/kg) | SD   | conc. (µg/kg) | SD   |
| Protocatechuic a.        | 1461.1          | 4.2   | 565.2         | 28.8 | 537.1         | 15.8 | 431.0         | 18.4 | 482.7         | 23.8 | 552.9         | 22.8 | 564.7         | 15.1 | 404.0         | 7.5  |
| Protocatechuic aldehyde  | 137.4           | 19.8  | 145.0         | 14.4 | 72.1          | 12.8 | 65.3          | 8.8  | 77.1          | 18.3 | 119.1         | 7.8  | 125.1         | 22.6 | 132.1         | 13.5 |
| 4-hydroxyphenylacetic a. | 215.9           | 46.2  | 241.2         | 30.7 | 180.8         | 8.3  | 115.9         | 7.6  | 193.6         | 2.3  | 188.4         | 16.2 | 192.6         | 3.7  | 217.1         | 21.0 |
| Chlorogenic a.           | 832.4           | 157.5 | 636.9         | 54.1 | 570.8         | 21.6 | 332.4         | 33.3 | 314.0         | 13.6 | 446.5         | 38.6 | 383.5         | 33.3 | 420.6         | 33.3 |
| Rutin                    | 204.3           | 44.3  | 92.6          | 10.1 | 91.5          | 4.3  | 98.4          | 21.3 | 62.3          | 1.8  | 122.1         | 15.3 | 107.1         | 13.0 | 130.0         | 9.4  |
| Ethylvanillin            | 90.8            | 17.3  | 64.2          | 8.0  | 67.3          | 2.0  | 81.7          | 14.0 | 44.7          | 8.1  | 63.7          | 3.4  | 63.2          | 3.4  | 68.1          | 3.6  |

**Table S2.** Regression parameters of analyzed standards. R<sup>2</sup> - coefficient of determination.

| No. | Compounds                  | Slope | Intercept | R <sup>2</sup> |
|-----|----------------------------|-------|-----------|----------------|
| 1   | Gallic acid                | 9.00  | 0.64      | 0.9993         |
| 2   | $\alpha$ -Resorcylic acid  | 10.75 | 6.00      | 0.9943         |
| 3   | Protocatechic acid         | 10.14 | 0.08      | 0.9995         |
| 4   | Gentisic acid              | 16.91 | 0.43      | 0.9990         |
| 5   | Protocatechuic aldehyde    | 5.25  | 0.11      | 0.9991         |
| 6   | $\beta$ -Resorcylic acid   | 20.20 | -2.46     | 0.9978         |
| 7   | 4-Hydroxyphenylacetic acid | 21.61 | -0.45     | 0.9988         |
| 8   | 4-Hydroxybenzoic acid      | 13.20 | 2.07      | 0.9954         |
| 9   | Vanillic acid              | 14.16 | 2.44      | 0.9933         |
| 10  | Chlorogenic acid           | 3.29  | 0.21      | 0.9980         |
| 11  | Vanillin                   | 13.13 | 0.88      | 0.9960         |
| 12  | Isovanillin                | 12.05 | -0.34     | 0.9958         |
| 13  | <i>p</i> -Coumaric acid    | 2.55  | -1.79     | 0.9903         |
| 14  | Ferulic acid               | 2.94  | -4.04     | 0.9986         |
| 15  | Sinapic acid               | 4.95  | -0.23     | 0.9987         |
| 16  | Salicylic acid             | 5.95  | -0.19     | 0.9952         |
| 17  | Rutin                      | 1.36  | 0.03      | 0.9918         |
| 18  | Ethylvanilline             | 12.29 | 0.13      | 0.9992         |
| 19  | Myricetin                  | 3.48  | 0.68      | 0.9991         |
| 20  | Quercetin                  | 4.50  | 0.77      | 0.9903         |
